# Supplementary material
Source: PubMed Central journal article supplement (PMC4109898)
Supplement: NIHMS557752-supplement-Supporting_figures.pdf [file NIHMS557752-supplement-Supporting_figures.pdf]

## Supplementary Online Content

Dysken MW, Sano M, Asthana S, et al. Effect of vitamin E and memantine on functional decline in Alzheimer disease: the TEAM-AD VA Cooperative randomized trial. *JAMA*. doi:10.1001/jama.2013.282834.

eTable 1. Physical Exam, Medical History, Laboratory Tests and Concomitant Medications at Baseline by Treatment Group

eTable 2. Number and Frequencies of Apolipoprotein  $\epsilon$ 2,  $\epsilon$ 3 and  $\epsilon$ 4 Alleles Overall and by Treatment Group

eTable 3. Number and Frequencies of Apolipoprotein  $\epsilon$ 4 Alleles Overall and by Treatment Group

eTable 4. Number and Frequencies of Apolipoprotein  $\epsilon$  Genotypes Overall and by Treatment Group

eTable 5. Missing Data Sensitivity Analyses for the Primary Outcome: Alzheimer's Disease Cooperative Study/Activities of Daily Living Inventory

eTable 6. Mean Changes in the Alzheimer's Disease Cooperative Study/Activities of Daily Living Measure During the 4-year Study Period as Compared With Baseline for Those With Mild Impairment Compared to Those With Moderate Impairment

eFigure. Kaplan-Meier Estimates of Survival of Vitamin E, Memantine, and the Combination Compared to Placebo

Correction: This eFigure was corrected online February 5, 2014.

This supplementary material has been provided by the authors to give readers additional information about their work.

©2013 American Medical Association. All rights reserved.

| <b>eTable 1. Physical Exam, Medical History, Laboratory Tests and Concomitant Medications at Baseline by Treatment Group</b> |                              |                              |                                              |                            |
|------------------------------------------------------------------------------------------------------------------------------|------------------------------|------------------------------|----------------------------------------------|----------------------------|
| <b>Characteristic</b>                                                                                                        | <b>Vitamin E<br/>(N=152)</b> | <b>Memantine<br/>(N=155)</b> | <b>Vitamin E +<br/>Memantine<br/>(N=154)</b> | <b>Placebo<br/>(N=152)</b> |
| <b>Physical Exam, mean ± SD</b>                                                                                              |                              |                              |                                              |                            |
| Body Mass Index                                                                                                              | 26.6 ± 4.5                   | 26.4 ± 4.2                   | 27.2 ± 4.6                                   | 26.6 ± 4.6                 |
| Systolic Blood Pressure                                                                                                      | 134 ± 17                     | 136 ± 18                     | 134 ± 17                                     | 133 ± 16                   |
| Diastolic Blood Pressure                                                                                                     | 73 ± 11                      | 72 ± 10                      | 73 ± 11                                      | 72 ± 11                    |
| <b>Laboratory Values, mean ± SD</b>                                                                                          |                              |                              |                                              |                            |
| International normalized ratio (INR)                                                                                         | 1.0 ± 0.1                    | 1.1 ± 0.7                    | 1.0 ± 0.1                                    | 1.0 ± 0.1                  |
| HDL Cholesterol, mg/dL                                                                                                       | 49 ± 14                      | 49 ± 17                      | 47 ± 14                                      | 48 ± 11                    |
| LDL Cholesterol, mg/dL                                                                                                       | 95 ± 33                      | 96 ± 33                      | 94 ± 31                                      | 99 ± 31                    |
| Total Cholesterol, mg/dL                                                                                                     | 169 ± 38                     | 168 ± 38                     | 166 ± 36                                     | 172 ± 38                   |
| Triglycerides, mg/dL                                                                                                         | 129 ± 77                     | 126 ± 71                     | 136 ± 81                                     | 133 ± 62                   |
| Fasting Glucose, mg/dL                                                                                                       | 111 ± 47                     | 105 ± 26                     | 108 ± 31                                     | 110 ± 37                   |
| Homocysteine, μmol/dL                                                                                                        | 13.1 ± 4.4                   | 13.6 ± 5.2                   | 13.7 ± 5.3                                   | 14.0 ± 4.7                 |
| Thyroid-stimulating Hormone, μIU/mL                                                                                          | 2.1 ± 1.3                    | 2.0 ± 1.1                    | 2.1 ± 1.6                                    | 2.3 ± 1.5                  |
| Vitamin B12, pg/mL                                                                                                           | 592 ± 292                    | 627 ± 338                    | 610 ± 356                                    | 586 ± 296                  |
| Creatinine Clearance, ml/min                                                                                                 | 63 ± 22                      | 62 ± 22                      | 65 ± 24                                      | 62 ± 24                    |
| Creatinine Clearance, N (%) < 30 ml/min                                                                                      | 4 (3)                        | 7 (5)                        | 4 (3)                                        | 7 (5)                      |
| <b>Medical History, N (%)</b>                                                                                                |                              |                              |                                              |                            |

©2013 American Medical Association. All rights reserved.

|                                                          |         |         |          |          |
|----------------------------------------------------------|---------|---------|----------|----------|
| Glaucoma or Cataract                                     | 57 (38) | 60 (39) | 52 (34)  | 53 (35)  |
| Diabetes                                                 | 41 (27) | 39 (25) | 45 (29)  | 42 (28)  |
| Emotional Problems                                       | 42 (28) | 33 (21) | 47 (31)  | 44 (29)  |
| Musculoskeletal Problems                                 | 43 (28) | 39 (25) | 34 (22)  | 50 (33)  |
| Heart Disease *                                          | 41 (27) | 28 (18) | 34 (22)  | 43 (28)  |
| Sleep Disorder                                           | 27 (18) | 23 (15) | 21 (14)  | 16 (11)  |
| Cerebrovascular Disease                                  | 12 (8)  | 15 (10) | 16 (10)  | 18 (12)  |
| Chronic Pain Syndrome                                    | 20 (13) | 11 (7)  | 10 (6)   | 12 (8)   |
| Peripheral Vascular Disease                              | 18 (12) | 10 (6)  | 9 (6)    | 13 (9)   |
| Parkinson's Disease                                      | 3 (2)   | 2 (1)   | 3 (2)    | 2 (1)    |
| Renal Disease (Moderate/Severe)                          | 1 (1)   | 0 (0)   | 1 (1)    | 0 (0)    |
| Smoker (current or past)                                 | 94 (62) | 95 (62) | 100 (65) | 98 (64)  |
| <b>Concomitant Medications, N (%)</b>                    |         |         |          |          |
| Statins                                                  | 90 (60) | 97 (63) | 93 (60)  | 100 (66) |
| Aspirin                                                  | 96 (63) | 89 (57) | 99 (64)  | 91 (60)  |
| Other Antiplatelets,<br>Anticoagulants, or Thrombolytics | 9 (6)   | 6 (4)   | 13 (8)   | 15 (10)  |
| Anticholinergics (Excluding<br>TCAs)                     | 7 (5)   | 7 (5)   | 6 (4)    | 6 (4)    |
| Tertiary Tricyclic Antidepressants                       | 5 (3)   | 5 (3)   | 5 (3)    | 3 (2)    |
| Other Antidepressants                                    | 51 (34) | 51 (33) | 52 (34)  | 59 (39)  |
| Antipsychotics                                           | 10 (7)  | 10 (6)  | 5 (3)    | 12 (8)   |
| Sedatives/Hypnotics                                      | 8 (5)   | 13 (8)  | 8 (5)    | 8 (5)    |
| Skeletal Muscle Relaxants                                | 8 (5)   | 5 (3)   | 9 (6)    | 5 (3)    |

©2013 American Medical Association. All rights reserved.

|                      |         |         |         |         |
|----------------------|---------|---------|---------|---------|
| Vitamin C †          | 16 (11) | 18 (12) | 15 (10) | 10 (7)  |
| Other Antioxidants ‡ | 20 (13) | 22 (14) | 15 (10) | 17 (11) |

\* Heart Disease includes a history of myocardial infarction, congestive heart failure, and/or angina.

† 14 participants were on vitamin C and at least one other antioxidant

‡ Other possible antioxidants included vitamin A, vitamin B6, vitamin B12, folate, zinc, selenium, lycopene, and magnesium.

**eTable 2. Number and Frequencies of apolipoprotein ε2, ε3 and ε4 alleles overall and by treatment group.**

| <b>Alleles — N* (%)</b> | <b>Vitamin E</b> | <b>Memantine</b> | <b>Vitamin E + Memantine</b> | <b>Placebo</b> | <b>Overall</b> |
|-------------------------|------------------|------------------|------------------------------|----------------|----------------|
| <b>ε2</b>               | 4 (2.1)          | 9 (4.3)          | 6 (2.7)                      | 15 (7.3)       | 34 (4.1)       |
| <b>ε3</b>               | 129 (67.2)       | 131 (62.4)       | 156 (70.3)                   | 133 (64.6)     | 549 (66.1)     |
| <b>ε4</b>               | 59 (30.7)        | 70 (33.3)        | 60 (27.0)                    | 58 (28.2)      | 247 (29.8)     |

\* N = the number of alleles.

Chi-square test two-sided p = 0.09; Fisher's Exact test two-sided p = 0.12.

**eTable 3. Number and frequencies of apolipoprotein ε4 alleles overall and by treatment group.**

| <b>Number of ε4 Alleles — N (%)</b> | <b>Vitamin E (N=96)</b> | <b>Memantine (N=105)</b> | <b>Vitamin E + Memantine (N=111)</b> | <b>Placebo (N=103)</b> | <b>Overall (N=415)</b> |
|-------------------------------------|-------------------------|--------------------------|--------------------------------------|------------------------|------------------------|
| <b>0</b>                            | 47 (49.0)               | 48 (45.7)                | 59 (53.2)                            | 55 (53.4)              | 209 (50.4)             |
| <b>1</b>                            | 39 (40.6)               | 44 (41.9)                | 44 (39.6)                            | 38 (36.9)              | 165 (39.8)             |
| <b>2</b>                            | 10 (10.4)               | 13 (12.4)                | 8 (7.2)                              | 10 (9.7)               | 41 (9.9)               |

Chi-square test two-sided p = 0.85.

| <b>eTable 4. Number and frequencies of apolipoprotein ε genotypes overall and by treatment group.</b> |                             |                              |                                              |                            |                            |
|-------------------------------------------------------------------------------------------------------|-----------------------------|------------------------------|----------------------------------------------|----------------------------|----------------------------|
| <b>APOε genotypes —<br/>N (%)</b>                                                                     | <b>Vitamin E<br/>(N=96)</b> | <b>Memantine<br/>(N=105)</b> | <b>Vitamin E +<br/>Memantine<br/>(N=111)</b> | <b>Placebo<br/>(N=103)</b> | <b>Overall<br/>(N=415)</b> |
| <b>ε2/ ε2</b>                                                                                         | 0                           | 0                            | 0                                            | 0                          | 0                          |
| <b>ε2/ ε3</b>                                                                                         | 2 (2.1)                     | 5 (4.8)                      | 3 (2.7)                                      | 9 (8.7)                    | 19 (4.6)                   |
| <b>ε2/ ε4</b>                                                                                         | 2 (2.1)                     | 4 (3.8)                      | 3 (2.7)                                      | 6 (5.8)                    | 15 (3.6)                   |
| <b>ε3/ ε3</b>                                                                                         | 45 (46.9)                   | 43 (41.0)                    | 56 (50.5)                                    | 46 (44.7)                  | 190 (45.8)                 |
| <b>ε3/ ε4</b>                                                                                         | 37 (38.5)                   | 40 (38.1)                    | 41 (36.9)                                    | 32 (31.1)                  | 150 (36.1)                 |
| <b>ε4/ ε4</b>                                                                                         | 10 (10.4)                   | 13 (12.4)                    | 8 (7.2)                                      | 10 (9.7)                   | 41(9.9)                    |

Chi-square test two-sided p = 0.45; Fisher's exact test two-sided p = 0.52.

| <b>eTable 5. Missing Data Sensitivity Analyses for the Primary Outcome: Alzheimer's Disease Cooperative Study/Activities of Daily Living Inventory</b> |                      |                       |                              |                   |
|--------------------------------------------------------------------------------------------------------------------------------------------------------|----------------------|-----------------------|------------------------------|-------------------|
|                                                                                                                                                        | <b>Vitamin E</b>     | <b>Memantine</b>      | <b>Vitamin E + Memantine</b> | <b>Placebo</b>    |
| <b>Missing Data Sensitivity Analysis 1*</b>                                                                                                            |                      |                       |                              |                   |
| Least Squares Means Change $\pm$ SE                                                                                                                    | -13.81 $\pm$ 1.10    | -14.97 $\pm$ 1.10     | -15.21 $\pm$ 1.11            | -16.96 $\pm$ 1.11 |
| Mean Difference Compared to Placebo (95% CI)                                                                                                           | 3.15<br>(0.92, 5.38) | 1.99<br>(-0.23, 4.20) | 1.75<br>(-0.48, 3.99)        | -                 |
| Unadjusted P-Value                                                                                                                                     | 0.006                | 0.08                  | 0.12                         | -                 |
| Adjusted P-Value                                                                                                                                       | 0.03                 | 0.39                  | 0.49                         | -                 |
| <b>Missing Data Sensitivity Analysis 2†</b>                                                                                                            |                      |                       |                              |                   |
| Least Squares Means Change $\pm$ SE                                                                                                                    | -13.82 $\pm$ 1.11    | -14.99 $\pm$ 1.10     | -15.21 $\pm$ 1.11            | -16.95 $\pm$ 1.11 |
| Mean Difference Compared to Placebo (95% CI)                                                                                                           | 3.13<br>(0.89, 5.36) | 1.96<br>(-0.26, 4.18) | 1.74<br>(-0.51, 3.98)        | -                 |
| Unadjusted P-Value                                                                                                                                     | 0.006                | 0.08                  | 0.13                         | -                 |
| Adjusted P-Value                                                                                                                                       | 0.04                 | 0.42                  | 0.52                         | -                 |

\* Original mixed model with data imputed for the first missing score following the last observed outcome based on the slope for each treatment group.

† Model is adjusted for baseline factors that were independently predictive of missing data, Age and baseline outcome score, to adjust the treatment effect based on the missingness mechanism.

©2013 American Medical Association. All rights reserved.

**eTable 6. Mean Changes in the Alzheimer’s Disease Cooperative Study/Activities of Daily Living Measure during the 4-year Study Period as Compared with Baseline for those with Mild Impairment (Baseline Mini-Mental State Examination score 20 to 26) compared to those with Moderate Impairment (Baseline Mini-Mental State Examination score 12 to 19)\***

| <b>Outcome</b>                                                                  | <b>Vitamin E</b>      | <b>Memantine</b>      | <b>Vitamin E + Memantine</b> | <b>Placebo</b>    |
|---------------------------------------------------------------------------------|-----------------------|-----------------------|------------------------------|-------------------|
| Mild impairment, N                                                              | 106                   | 105                   | 110                          | 89                |
| Moderate impairment, N                                                          | 46                    | 50                    | 44                           | 63                |
| Least Squares Means Change $\pm$ SE for those with Mild impairment              | -13.39 $\pm$ 1.20     | -14.16 $\pm$ 1.20     | -13.77 $\pm$ 1.19            | -15.11 $\pm$ 1.29 |
| Least Squares Means Change $\pm$ SE for those with Moderate impairment          | -14.78 $\pm$ 1.68     | -16.85 $\pm$ 1.64     | -19.16 $\pm$ 1.77            | -19.60 $\pm$ 1.47 |
| Mean Difference (95% CI) Compared to Placebo for those with Mild impairment     | 1.72<br>(-1.05, 4.50) | 0.96<br>(-1.82, 3.73) | 1.34<br>(-1.42, 4.10)        | -                 |
| Mean Difference (95% CI) Compared to Placebo for those with Moderate impairment | 4.82<br>(1.03, 8.62)  | 2.75<br>(-0.99, 6.48) | 0.44<br>(-3.52, 4.39)        | -                 |
| Interaction p = 0.38*                                                           |                       |                       |                              |                   |

\*Test of interaction of treatment effect by Alzheimer’s disease severity level defined by MMSE.



Correction: This eFigure was corrected online February 5, 2014.

**eFigure. Kaplan-Meier Estimates of Survival of Vitamin E, Memantine and the Combination compared to Placebo.**

Vitamin E vs. Placebo

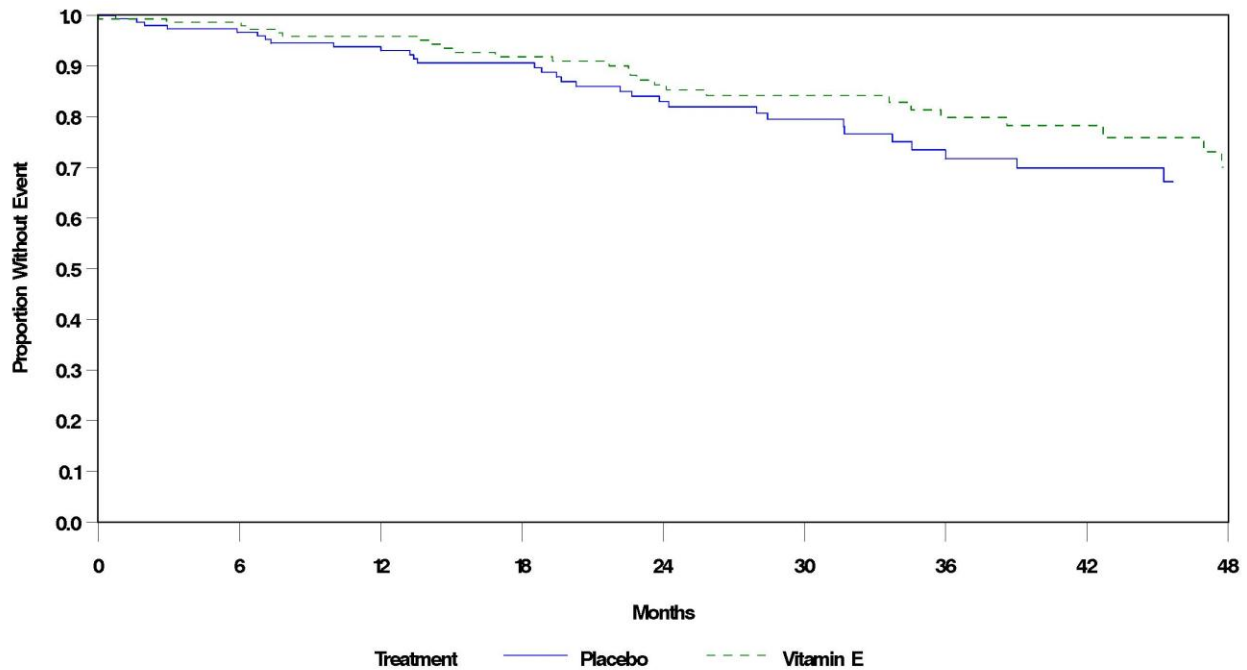

|           |     |     |     |    |    |    |    |    |  |
|-----------|-----|-----|-----|----|----|----|----|----|--|
| Placebo   |     |     |     |    |    |    |    |    |  |
| At Risk:  | 142 | 126 | 112 | 80 | 65 | 46 | 38 | 25 |  |
| Failed:   | 5   | 9   | 13  | 21 | 24 | 28 | 30 | 31 |  |
| Vitamin E |     |     |     |    |    |    |    |    |  |
| At Risk:  | 146 | 138 | 110 | 90 | 78 | 54 | 48 | 23 |  |
| Failed:   | 2   | 6   | 11  | 17 | 19 | 22 | 23 | 26 |  |

Log-Rank Chi-Square = 10340 P-value = 0.3092 N = 304 Failed = 57

### Memantine vs. Placebo

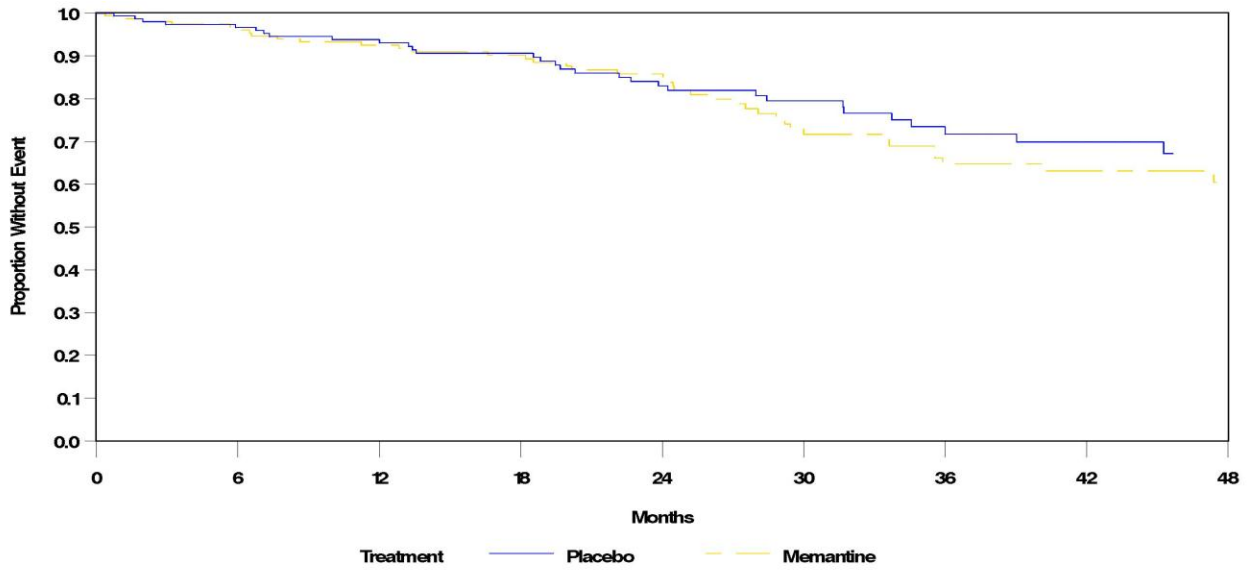

|           |     |     |     |    |    |    |    |    |  |
|-----------|-----|-----|-----|----|----|----|----|----|--|
| Memantine |     |     |     |    |    |    |    |    |  |
| At Risk:  | 145 | 124 | 111 | 91 | 60 | 47 | 38 | 23 |  |
| Failed:   | 5   | 11  | 14  | 19 | 31 | 36 | 38 | 39 |  |
| Placebo   |     |     |     |    |    |    |    |    |  |
| At Risk:  | 142 | 126 | 112 | 80 | 65 | 46 | 38 | 25 |  |
| Failed:   | 5   | 9   | 13  | 21 | 24 | 28 | 30 | 31 |  |

Log-Rank Chi-Square = 0.5344 P-value = 0.4648 N = 307 Failed = 70

### Vitamin E + Memantine vs. Placebo

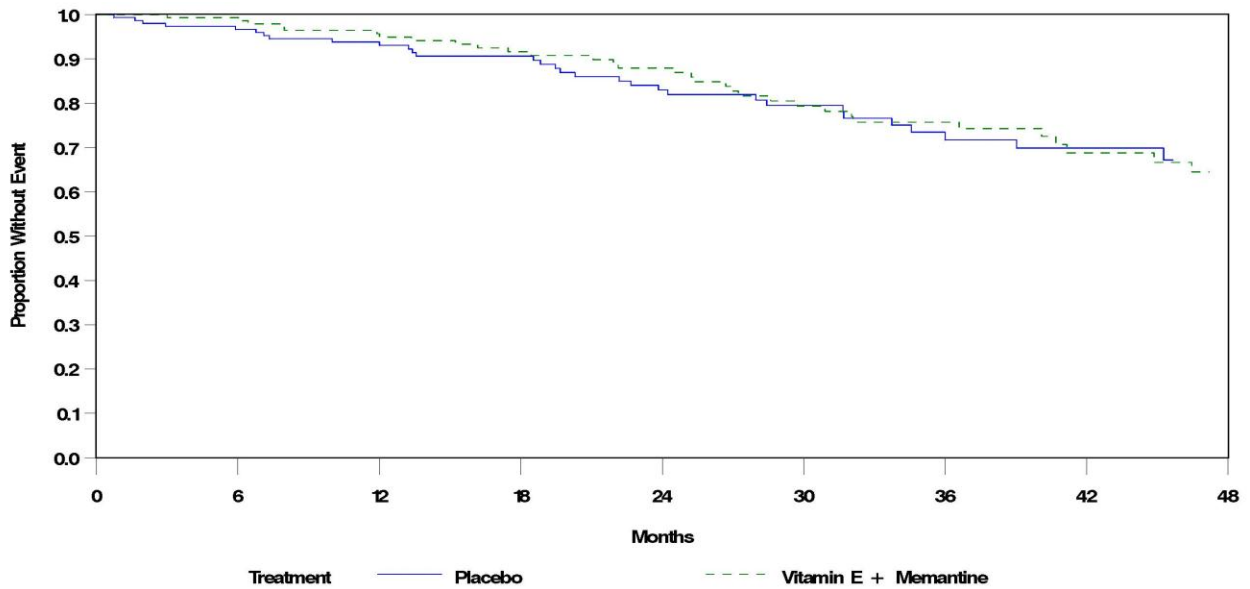

|                       |     |     |     |    |    |    |    |    |  |
|-----------------------|-----|-----|-----|----|----|----|----|----|--|
| Placebo               |     |     |     |    |    |    |    |    |  |
| At Risk:              | 142 | 126 | 112 | 80 | 65 | 46 | 38 | 25 |  |
| Failed:               | 5   | 9   | 13  | 21 | 24 | 28 | 30 | 31 |  |
| Vitamin E + Memantine |     |     |     |    |    |    |    |    |  |
| At Risk:              | 149 | 125 | 110 | 92 | 70 | 62 | 36 | 30 |  |
| Failed:               | 1   | 6   | 11  | 15 | 22 | 26 | 30 | 32 |  |

Log-Rank Chi-Square = 0.0641 P-value = 0.8002 N = 306 Failed = 63

### Vitamin E and Vitamin E + Memantine vs. Placebo and Memantine

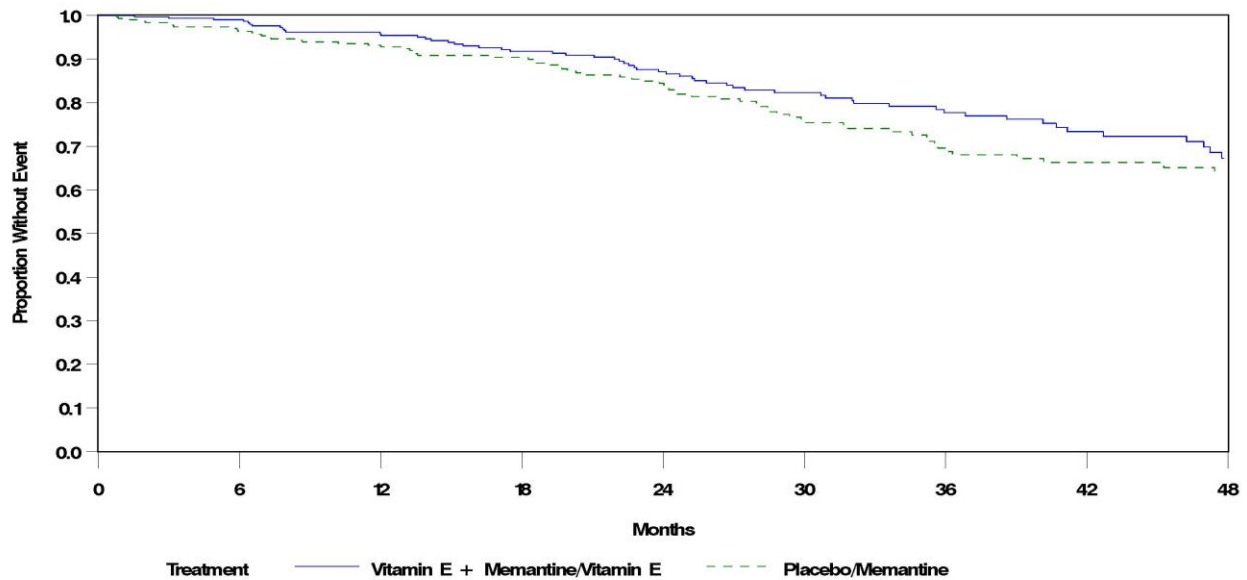

|                                 |     |     |     |     |     |     |    |    |
|---------------------------------|-----|-----|-----|-----|-----|-----|----|----|
| Placebo/Memantine               |     |     |     |     |     |     |    |    |
| At Risk:                        | 287 | 248 | 217 | 171 | 120 | 91  | 74 | 42 |
| Failed:                         | 10  | 20  | 27  | 40  | 55  | 64  | 68 | 70 |
| Vitamin E + Memantine/Vitamin E |     |     |     |     |     |     |    |    |
| At Risk:                        | 294 | 251 | 219 | 178 | 140 | 107 | 75 | 50 |
| Failed:                         | 3   | 12  | 22  | 32  | 41  | 48  | 53 | 58 |

Log-Rank Chi-Square = 2.0587 P-value = 0.1513 N = 613 Failed = 128

### Memantine and Vitamin E + Memantine vs. Placebo and Vitamin E

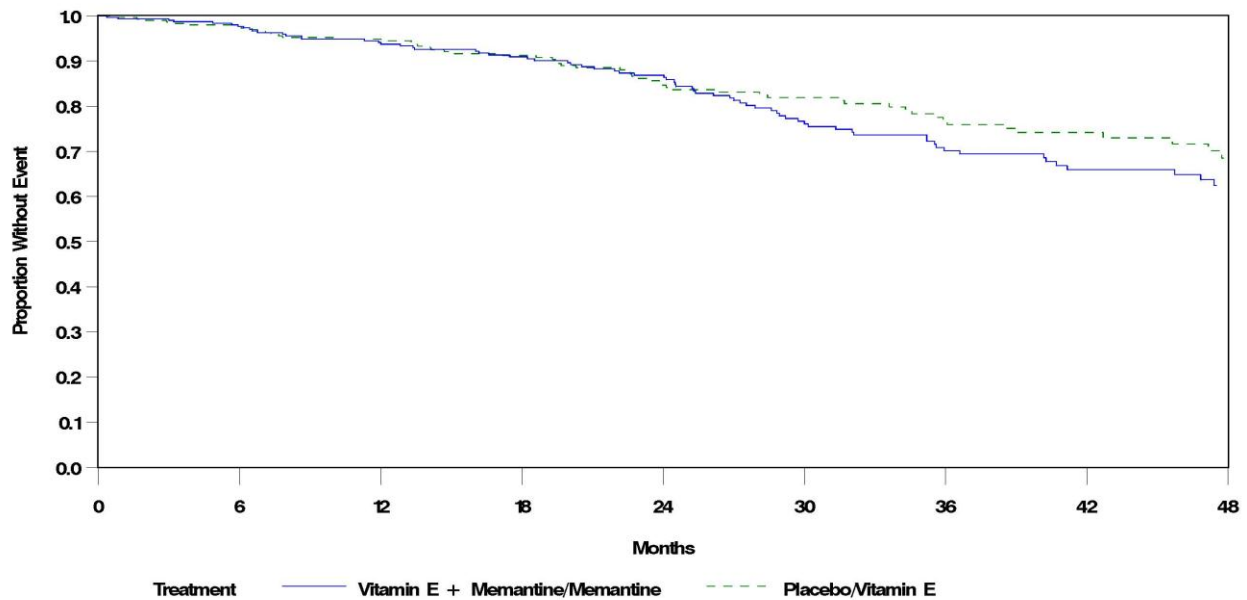

|                                 |     |     |     |     |     |     |    |    |
|---------------------------------|-----|-----|-----|-----|-----|-----|----|----|
| Placebo/Vitamin E               |     |     |     |     |     |     |    |    |
| At Risk:                        | 286 | 261 | 216 | 170 | 137 | 97  | 85 | 41 |
| Failed:                         | 7   | 15  | 24  | 38  | 43  | 50  | 53 | 57 |
| Vitamin E + Memantine/Memantine |     |     |     |     |     |     |    |    |
| At Risk:                        | 290 | 249 | 221 | 181 | 129 | 101 | 73 | 50 |
| Failed:                         | 6   | 17  | 25  | 34  | 53  | 62  | 68 | 71 |

Log-Rank Chi-Square = 1.1711 P-value = 0.2792 N = 613 Failed = 128

©2013 American Medical Association. All rights reserved.
